# Supplementary material for: Physiological and Growth Responses of Potato (Solanum Tuberosum L.) to Air Temperature and Relative Humidity under Soil Water Deficits
Source: Plants (Basel). 2022 Apr 21;11(9):1126. doi: 10.3390/plants11091126 (PMC9105088; doi:10.3390/plants11091126)
Supplement: Supplementary file 1 [file plants-11-01126-s001.zip › plants-1667529-supplementary.pdf]

# Physiological and growth responses of potato (*Solanum tuberosum* L.) to air temperature and relative humidity under soil water deficits

Peng Zhang<sup>1,2,4,5</sup>, Xin Yang<sup>2,3,4</sup>, Kiril Manevski<sup>5,6</sup>, Shenglan Li<sup>2</sup>, Zhenhua Wei<sup>4</sup>, Mathias Neumann Andersen<sup>5,6</sup>, Fulai Liu<sup>2,6\*</sup>

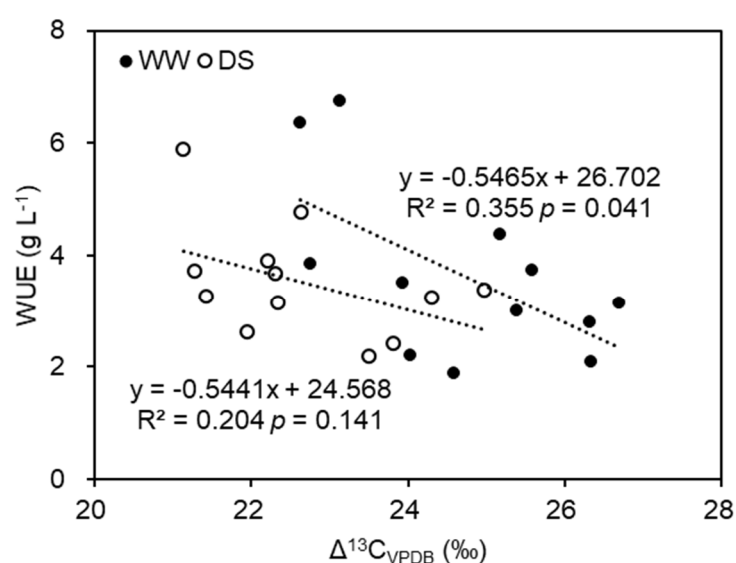

**Figure S1.** Relationship between leaf carbon isotope discrimination ( $\Delta^{13}C$ ) and water use efficiency (WUE) of well-watered (WW) and drought-stressed (DS) potato plants grown in the greenhouse cells at final harvest. Regression line is accompanied with equation, significance level ( $p$ -value) and coefficient of determination ( $R^2$ ).

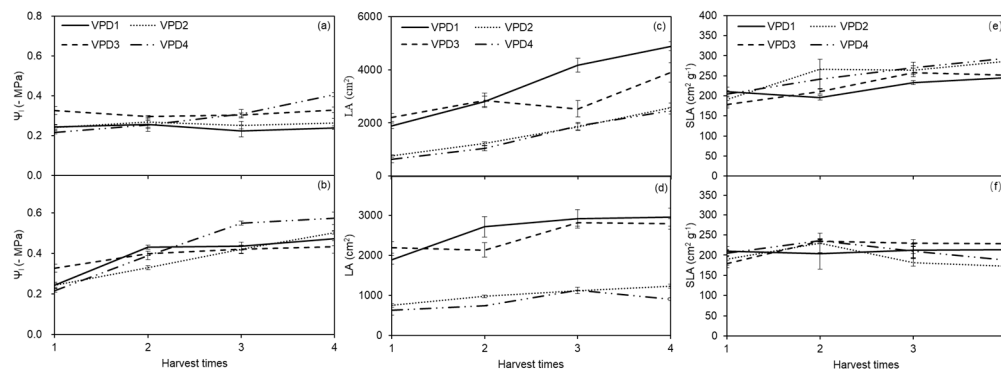

**Figure S2.** Leaf water potential ( $\psi$ ), leaf area ( $LA$ ) and special leaf area ( $SLA$ ) of well-watered (WW; a, c, e) and drought-stressed (DS; b, d, f) potato plants grown under different vapor pressure deficit in the greenhouse cells at different harvest times. Error bars indicate the S.E. ( $n = 3$ ). Values for WW and DS plants are equal at first harvest, after which irrigation treatment commenced. VPD1, normal temperature and high relative humidity; VPD2, high temperature and relative humidity; VPD3, normal temperature and low relative humidity; VPD4, high temperature and low relative humidity.

**Table S1.** Two-way analysis of variance for abscisic acid concentration in leaf ( $[ABA]_{leaf}$ ) and xylem ( $[ABA]_{xylem}$ ), leaf water potential ( $\psi_l$ ), stomatal density ( $SD$ ), stomatal pore aperture ( $SA$ ), leaf area ( $LA$ ), special leaf area ( $SLA$ ), leaf carbon isotope ( $\Delta^{13}C$ ), shoot dry matter ( $DM_{shoot}$ ), water consumption ( $WU$ ) and water use efficiency ( $WUE$ ) of potato plants grown under different vapor pressure deficit (VPD1, normal temperature and high relative humidity; VPD2, high temperature and relative humidity; VPD3, normal temperature and low relative humidity; VPD4, high temperature and low relative humidity) and irrigation (Irr, full or nill) at the final harvest. Data are showed in Figures. 3-5.

| Factor      | $[ABA]_{leaf}$<br>(ng g <sup>-1</sup> ) | $[ABA]_{xylem}$<br>(pmol ml <sup>-1</sup> ) | $\Psi_l$<br>(MPa) | $SD$<br>(mm <sup>-2</sup> ) | $SA$<br>( $\mu$ m <sup>2</sup> ) | $LA$<br>(cm <sup>2</sup> ) | $SLA$<br>(cm <sup>2</sup> g <sup>-1</sup> ) | $\Delta^{13}C$<br>(‰) | $DM_{shoot}$<br>(g) | $WU$<br>(L) | $WUE$<br>(g L <sup>-1</sup> ) |
|-------------|-----------------------------------------|---------------------------------------------|-------------------|-----------------------------|----------------------------------|----------------------------|---------------------------------------------|-----------------------|---------------------|-------------|-------------------------------|
| [Irr]       | **                                      | ***                                         | ***               | ns                          | ***                              | ***                        | ***                                         | ***                   | ***                 | ***         | ns                            |
| [VPD]       | ***                                     | **                                          | **                | *                           | ***                              | ***                        | ns                                          | ***                   | ***                 | ns          | **                            |
| [Irr]×[VPD] | **                                      | **                                          | ns                | ns                          | ns                               | *                          | **                                          | *                     | *                   | *           | ns                            |

Note: \*, \*\* and \*\*\* indicate significance levels at  $p < 0.05$ ,  $p < 0.01$  and  $p < 0.001$ , respectively; ns denotes no significant.

**Table S2.** Three-way analysis of variance for leaf water potential ( $\psi_l$ ), leaf area ( $LA$ ) and special leaf area ( $SLA$ ) of potato plants grown under different vapor pressure deficit (VPD1, normal temperature and high relative humidity; VPD2, high temperature and relative humidity; VPD3, normal temperature and low relative humidity; VPD4, high temperature and low relative humidity) and irrigation (Irr, full or nill) at different harvest times.

| Factor     | $\Psi_l$ (MPa) |     |     |     | $LA$ (cm <sup>2</sup> ) |     |     |     | $SLA$ (cm <sup>2</sup> g <sup>-1</sup> ) |    |    |     |
|------------|----------------|-----|-----|-----|-------------------------|-----|-----|-----|------------------------------------------|----|----|-----|
|            | Harvest times  |     |     |     | Harvest times           |     |     |     | Harvest times                            |    |    |     |
|            | 1              | 2   | 3   | 4   | 1                       | 2   | 3   | 4   | 1                                        | 2  | 3  | 4   |
| [T]        | **             | **  | *   | *   | ***                     | *** | *** | *** | ns                                       | ns | ns | ns  |
| [RH]       | *              | *   | ns  | **  | ns                      | ns  | ns  | ns  | ns                                       | ns | ns | ns  |
| [Irr]      | **             | *** | *** | *** | *                       | ns  | *   | *   | *                                        | *  | *  | *** |
| [T×RH]     | **             | *   | ns  | *   | ns                      | ns  | ns  | ns  | ns                                       | ns | ns | ns  |
| [T×Irr]    | *              | ns  | ns  | ns  | ns                      | ns  | ns  | ns  | ns                                       | ns | ns | *   |
| [RH×Irr]   | ns             | ns  | ns  | ns  | ns                      | ns  | ns  | ns  | ns                                       | ns | ns | ns  |
| [T×RH×Irr] | ns             | ns  | ns  | ns  | ns                      | ns  | ns  | ns  | ns                                       | ns | ns | ns  |

Note: \*, \*\* and \*\*\* indicate significance levels at  $p < 0.05$ ,  $p < 0.01$  and  $p < 0.001$ , respectively; ns denotes no significant.

**Table S3.** Two-way analysis of variance for leaf water potential ( $\psi_l$ ), leaf area ( $LA$ ) and special leaf area ( $SLA$ ) of potato plants grown under different vapor pressure deficit (VPD1, normal temperature and high relative humidity; VPD2, high temperature and relative humidity; VPD3, normal temperature and low relative humidity; VPD4, high temperature and low relative humidity) and irrigation (Irr, full or nill) at different harvest times.

| Factor      | $\Psi_l$ (MPa) |     |    |     | $LA$ (cm <sup>2</sup> ) |     |     |     | $SLA$ (cm <sup>2</sup> g <sup>-1</sup> ) |    |    |     |
|-------------|----------------|-----|----|-----|-------------------------|-----|-----|-----|------------------------------------------|----|----|-----|
|             | Harvest times  |     |    |     | Harvest times           |     |     |     | Harvest times                            |    |    |     |
|             | 1              | 2   | 3  | 4   | 1                       | 2   | 3   | 4   | 1                                        | 2  | 3  | 4   |
| [Irr]       | **             | *** | ** | *** | *                       | *** | *** | *   | *                                        | *  | ** | *** |
| [VPD]       | *              | **  | *  | **  | **                      | *   | *   | *** | ns                                       | ns | ns | ns  |
| [Irr]×[VPD] | ns             | ns  | ns | ns  | *                       | ns  | ns  | ns  | ns                                       | ns | ns | ns  |

Note: \*, \*\* and \*\*\* indicate significance levels at  $p < 0.05$ ,  $p < 0.01$  and  $p < 0.001$ , respectively; ns denotes no significant.
